# Supplementary material
Source: MDPI journal article supplement (https://www.mdpi.com/2673-4176/5/2/10)
Supplement: s1 [file s1]

**Development of bilayer polysaccharide-based films combining extrusion and  
electrospinning for active food packaging**

Rodrigo F. Gouvêa, Cristina T. Andrade\*

Universidade Federal do Rio de Janeiro, Programa de Pós-Graduação em Ciência de  
Alimentos, Instituto de Química, Avenida Moniz Aragão 360, Bloco 8G/CT2  
21941-594 Rio de Janeiro, RJ, Brazil

Corresponding author

E-mail address: ctandrade@iq.ufrj.br

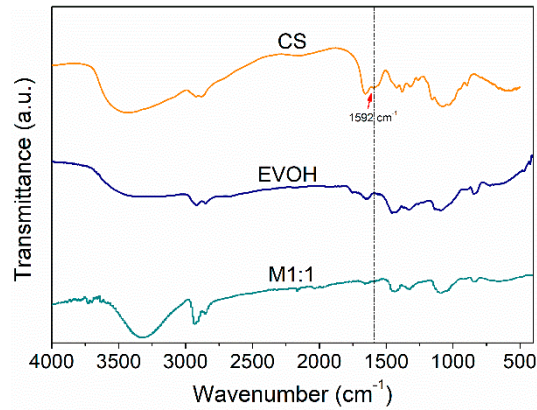

**Figure S1** FTIR spectra for CS, EVOH and for the CS/EVOH electrospun film.

**Table S1** Thickness, stress at break ( $\sigma_{\max}$ ), strain at break ( $\epsilon_{\max}$ ) and Young's modulus (E) for the materials

| Sample <sup>a</sup> | Average thickness* (μm)   | $\sigma_{\max}^*$ (MPa)  | $\epsilon_{\max}^*$ (%) | E* (MPa)                 |
|---------------------|---------------------------|--------------------------|-------------------------|--------------------------|
| TPS/MCC             | 248.5 <sup>a</sup> ± 34.4 | 1.8 <sup>a,b</sup> ± 0.8 | 2.0 <sup>a</sup> ± 0.9  | 0.9 <sup>a,b</sup> ± 0.0 |
| SM                  | 336.6 <sup>b</sup> ± 51.6 | 0.9 <sup>b</sup> ± 0.1   | 2.4 <sup>a</sup> ± 0.4  | 0.6 <sup>a</sup> ± 0.0   |
| SM5                 | 366.0 <sup>b</sup> ± 24.1 | 1.3 <sup>b</sup> ± 0.4   | 2.7 <sup>a</sup> ± 0.6  | 0.6 <sup>a</sup> ± 0.2   |
| SM10                | 370.5 <sup>b</sup> ± 38.5 | 1.7 <sup>a,b</sup> ± 0.4 | 1.8 <sup>a</sup> ± 0.9  | 1.4 <sup>b</sup> ± 0.6   |
| SM15                | 353.3 <sup>b</sup> ± 82.1 | 2.2 <sup>a</sup> ± 0.4   | 2.1 <sup>a</sup> ± 0.2  | 1.3 <sup>b</sup> ± 0.3   |

TPS/MCC, first layer composed of thermoplastic starch (TPS) incorporated with microcrystalline cellulose (MCC); SM, SM5, SM10 and SM15 bilayer films formed by deposition of electrospun nanofibers of chitosan/poly(ethylene-*co*-vinyl alcohol) mixed solution onto TPS/MCC layer with gallic acid at 0, 5.0, 10.0 and 15.0 mass% concentration, respectively.

\*Means within a column with different letters are significantly different ( $p < 0.05$ ).

**Table S2** DPPH radical scavenging activity

| Sample <sup>a</sup> | Radical scavenging activity*<br>( $\mu\text{mol.L}^{-1}.\text{Eq.Trolox.g}^{-1}$ ) |                          |                            | Radical scavenging activity*<br>(%) |          |          |
|---------------------|------------------------------------------------------------------------------------|--------------------------|----------------------------|-------------------------------------|----------|----------|
|                     | GA extraction time in 95% ethanol                                                  |                          |                            |                                     |          |          |
|                     | 1 h                                                                                | 3 h                      | 24 h                       | 1 h                                 | 3 h      | 24 h     |
| SM5                 | 268.9 <sup>a</sup> ±19.1                                                           | 324.8 <sup>a</sup> ±12.5 | 448.9 <sup>a</sup> ±66.7   | 15.9±1.5                            | 19.2±0.9 | 26.5±4.2 |
| SM10                | 238.8 <sup>a</sup> ±39.9                                                           | 308.6 <sup>a</sup> ±30.8 | 624.4 <sup>a,b</sup> ±56.7 | 14.1±2.0                            | 18.2±1.6 | 34.8±2.1 |
| SM15                | 512.5 <sup>b</sup> ±36.3                                                           | 554.4 <sup>b</sup> ±58.5 | 903.8 <sup>b</sup> ±62.2   | 30.3±2.9                            | 32.8±4.4 | 53.5±3.0 |

<sup>a</sup>SM5, SM10 and SM15 are bilayer films formed by deposition of electrospun nanofibers of chitosan/poly(ethylene-*co*-vinyl alcohol) mixed solution with gallic acid at 5.0, 10.0 and 15.0 mass% concentration, respectively, onto extruded TPS/MCC layer.

\* Means within a column with different letters are significantly different ( $p < 0.05$ ).
